# Supplementary material
Source: Springer Nature journal article supplement (https://www.springermedizin.de/resource/supplementary/13012_2009_169_MOESM4_ESM.pdf/9629390)

# Sensitivity

# Specificity

## Page

- Cold relief: recommend medication - must do
- should do
- should not do
- must not do
- Cold relief: physician required
- must do
- should do
- should not do
- must not do
- Pain relief: recommend medication - must do
- should do
- could do
- should not do
- must not do
- Pain relief: physician required
- must do
- should do
- should not do
- must not do

## Luck

- Necessary care
- Unnecessary care

## Zuckermann

- Diagnosis
- Drug name
- Drug dosage
- Drug action
- Side effects
- Other therapy
- Appointments
- Diagnostic studies

## Wilson

- Smoking (proxy=notes)
- Alcohol use (proxy=notes)
- Blood pressure (proxy=notes)
- Smoking (proxy=patient questionnaire)
- Alcohol use (proxy=patient questionnaire)
- Blood pressure (proxy=patient questionnaire)

## Ward

- Ask about smoking
- Advise to stop smoking

## Flocke

- Smoking cessation
- Exercise
- Diet
- Smoking
- Alcohol use
- Substance use
- Sun exposure
- Seatbelt use
- HIV prevention
- STD prevention

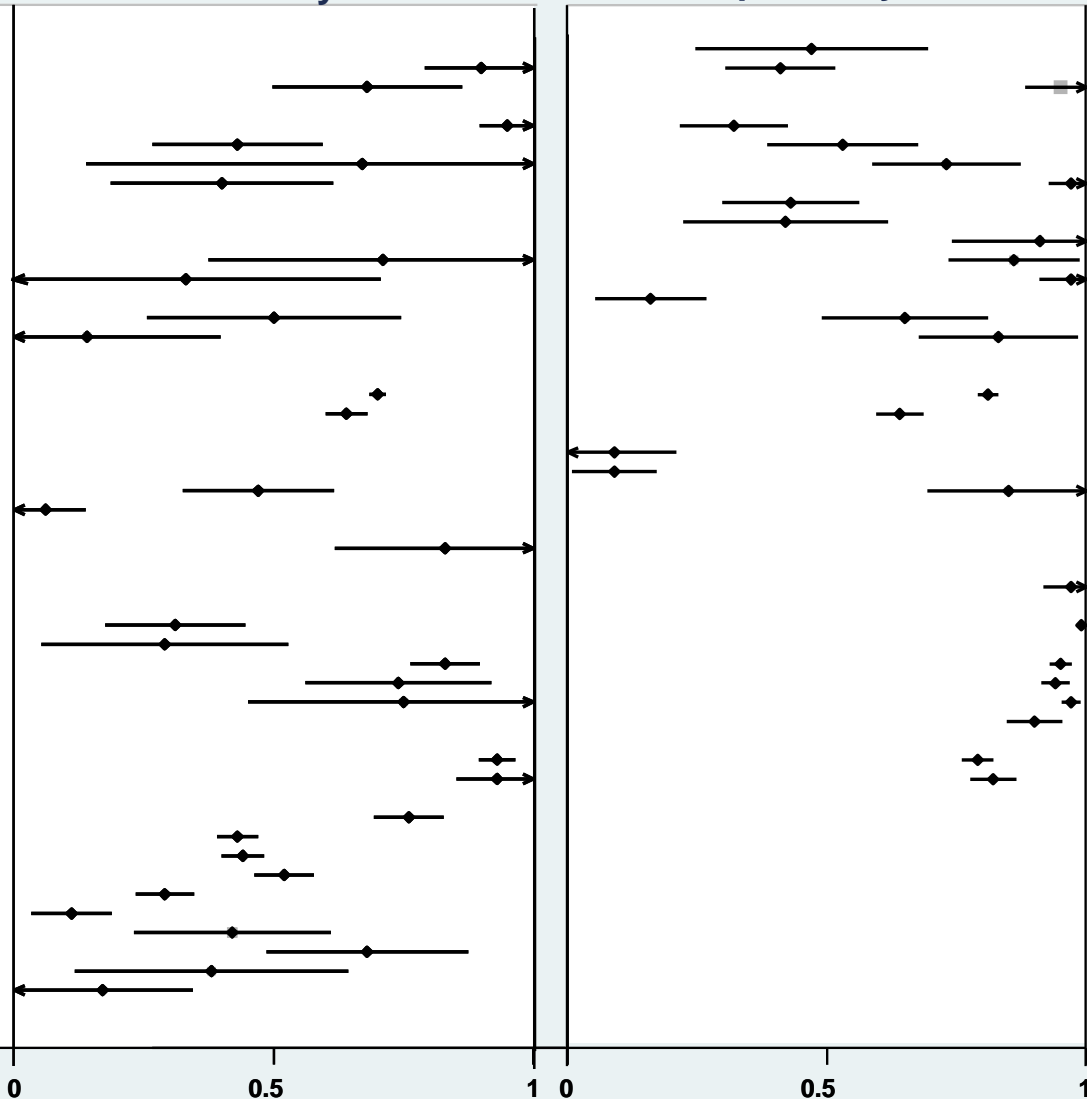

Supplement: MOESM4 [file 9629390]
